# Supplementary material for: Lack of awareness prevents the use of compost and biochar as soil amendments by Ghanaian cocoa farmers
Source: Research Square preprint supplement (doi:10.21203/rs.3.rs-6534344/v1), 2025-07-01
Supplement: Supplementary file 1 [file 7b8ea94a15b83831c40e7f2b.docx]

GCRF- Cocoa Soil Project Questionnaire

Hello, my name is ……………………………………………………….. I am collecting data to understand your work as a cocoa farmer, farm size and production practices and yield levels. It is being conducted by a team from Kwame Nkrumah University of Science and Technology (KNUST) and Cocoa Research Institute of Ghana (CRIG) in collaboration with the University of Reading UK, with support from Global Challenge Research Fund (GCRF; a UK Government Research Fund). Your answers will be kept confidential.

**A: IDENTIFICATION**

A1 Name of Numerator………………………………….

A2 Date of interview ……………………

A3 Record GPS of farm/community……………………..

**B: DEMOGRAPHIC CHARACTERISTICS**

B1. Town/Village……………………………………………

B2 Operational area /farm locations………………………

1. New Sanfo
2. Akropong
3. Sendu
4. Homaho
5. Kubekor
6. Assin Foso
7. Dadiesoaba
8. Mankesim
9. Acherensua
10. Pameng
11. Tweapease
12. Kade
13. Agona Namanwura
14. Kwanyako
15. Agona Mensakrom

B3. Cocoa District: 1. Aiyinase; 2. Assin Foso; 3. Dadiesoaba; 4. Kade; 5. Nyakrom

.

B4 Region: 1.Western South; 2. Central; 3. Bono; 4., Eastern

B5. Name of Respondent ……………………………………………………….

B6 Telephone contact of respondent………………..

B7. Gender of the respondent

1=Male

2=Female

B8. Age of respondent in years …………………………………

B9 Is Respondent the Household Head?

1 = Yes

2=No

B10 For how many years have you lived in this community?................

B11 Are you a native of this locality?

1=Yes

2=No

B12 If you are not a native what is your residential status?

1=Migrant from Ghana

2= Migrant from outside Ghana

B13 Number of years in formal School……………………

B14 Highest level of Educational

1=Never attended school

2=Primary school

3=Junior high school

4=Senior high school

5=Vocational Education

6=Tertiary (University, Polytechnic, etc.)

7=Koranic education

8=Other (specify)

B15. Marital status of the respondent:

1=Married

2=Consensual union/Co-habitation

3=Separated

4=Divorced

5=Widowed

6=Single/Never married

B16 Household composition (number of people living under respondents care )

| Age Group & other measures | Gender | | Total | Number not earning income | Number of adults |
| --- | --- | --- | --- | --- | --- |
| Male | Female |  |  |  |
| Under 15 yrs |  |  |  |  |  |
| 15-30 yrs |  |  |  |  |  |
| > 30 <65yrs |  |  |  |  |  |
| Above 65 years |  |  |  |  |  |
| Total |  |  |  |  |  |
| Dependency ratio | Dependency ratio: Number earning income/ number not earning income | | | | |
| Adult Equivalent | = 1+0.7(N1) +0.5(N2) where N1= number above 15 years, N2= Number below 15 years | | | | |

B17 Do you belong to any farmer based organization

1=Yes

2= No

B18 if yes state the name of the organization ………………………….

B19 How long have you been a member of this organization in years…………..

B20 Do you have responsibility (serve on any committee) in any organization or within the society?

1=Yes

2= No

B21. If you have any responsible position kindly state the position …………………………………

*1= chairman;*

*2= Vice chairman;*

*3= Treasure*

*4=secretary*

*5= member*

*6= other (specify)……………………………*

B22 State the reason(s) for joining the organization ……………………………………………………

…………………………………………………………………………………………………………………

…………………………………………………………………………………………………………………

B23 Are you engaged in other income generation activity apart from cocoa farming?

1=Yes

2= No

B24 If you engage in other income (economic) activities please describe them?(select only one)

1= Self employed

2= employee

B25 if you are self employed which area

| Sn# | Activities | Tick all as applicable | Rank from main activity 1 to minor activity 5 |  |  |
| --- | --- | --- | --- | --- | --- |
| 1 | Artisan |  |  |  |  |
| 2 | Petty Trading |  |  |  |  |
| 3 | By-day labourer |  |  |  |  |
| 4 | Food processing |  |  |  |  |
| 5 | Others |  |  |  |  |

**C. COCOA PRODUCTION**

C1 How many years have you been into cocoa cultivation?

C2 How many plots of Cocoa farm do you have?……………

C3 Complete the table below on cocoa cultivation

| **Plot No** | **Plot size in Acres/Poles** | **Age of farm** | ***Cocoa variety** | **Cocoa output in bags in past year** | | ****Nature of holding** | ****If share cropping** |
| --- | --- | --- | --- | --- | --- | --- | --- |
| Minor | Major |  |
| 1 |  |  |  |  |  |  |  |
| 2 |  |  |  |  |  |  |  |
| 3 |  |  |  |  |  |  |  |
| 4 |  |  |  |  |  |  |  |
| 5 |  |  |  |  |  |  |  |

**Cocoa varieties: 1=Amelonado, 2= Hybrid (from SPU); 3= Mixture*

**Nature of holding: 1=inherited; 2= Lease, 3=Rent; 4=Share Cropping

*** Share cropping : 1=Abunu ; 2= Abusa)

C4 Which of these crops do you grow in addition to cocoa?

| **SN#** | **Crops** | **Tick as applied** | **Rank from larger proportion to smaller proportion 1-7** | **Remark** |
| --- | --- | --- | --- | --- |
| 1 | Plantain |  |  |  |
| 2 | Cassava |  |  |  |
| 3 | Cocoyam |  |  |  |
| 4 | Yam |  |  |  |
| 5 | Maize |  |  |  |
| 6 | Vegetables |  |  |  |
| 7 | Others (specify) |  |  |  |
|  |  |  |  |  |

C5 What percentage did cocoa contribute to total annual household income?..

1=less than 50%

2=between 50% and 70%

3= above 70%

C6 Proportion of available farmland used for cocoa cultivation

1=less than 50%

2=between 50% and 70%

3= above 70%

C7 Proportion of family labour used in Cocoa cultivation

1=less than 50%

2=between 50% and 70%

3= above 70%

C8 proportion of total hired labour used in Cocoa cultivation

1=less than 50%

2=between 50% and 70%

3= above 70%

C9 Proportion of total expenses that are related to Cocoa cultivation

1=less than 50%

2=between 50% and 70%

3= above 70%

C10 Do you have contact with cocoa extension officers?

1=Yes

2=No

C11 If you do have contact with Cocoa Extension Agents (CEAs) how many times do you meet with the extension officer in the month? ………………………………………..

C12 How did you perceive soil fertility over the years

1= the same

2= declining

3= has improved

4=I can’t tell

C13 Did you have any training on how to maintain soil fertility including use of fertilizer?

1 = Yes

2= No

C14 If yes, list the entity and the date of training (multiple response) tick as many as applied

| **Sn #** | Training entities | **Thick as applicable** | **Order from major impact 1 to least impact 5** | **Remark** |
| --- | --- | --- | --- | --- |
| 1 | Cocoa extension agents/ officers |  |  |  |
| 2 | NGOs |  |  |  |
| 3 | MoFA extension Agents |  |  |  |
| 4 | Colleagues farmers |  |  |  |
| 5 | Others –specify |  |  |  |
|  |  |  |  |  |
|  |  |  |  |  |

C15 if you think you have challenge with soil fertility what actions do you take to improve the soil fertility ……………………………………………………………………………………………..

………………………………………………………………………………………………………………..

……………………………………………………………………………………………………………….

C16 Indicate the soil amendment you use to improve soil fertility on your cocoa farm

1= inorganic fertilizer

2= Organic fertilizer

3= Both inorganic and organic fertilizer

C17 Have you ever experience major disease incidence on your farm recently

1 = Yes

2= No

C18 Did you use pesticides on your cocoa farm in the past twelve months?

1 = Yes

2= No

C19 If you use pesticide kindly indicate source of your pesticide supply

| Sn# | Source of supply | Tick as applicable | Rank from 1 main supply source to 4 minor supply source |
| --- | --- | --- | --- |
| 1 | CODAPEC |  |  |
| 2 | LBCs |  |  |
| 3 | Co-operative own initiative |  |  |
| 4 | Personal purchases |  |  |

C20 What are the constraints you faced in the use of pesticide and disease control?

| Sn# | Source of supply | Tick as applicable | Rank from 1 major constraint to 7 minor constraint |
| --- | --- | --- | --- |
| 1 | In adequate supply from CODAPEC- COCOBOD |  |  |
| 2 | An availability of supply from dealers |  |  |
| 3 | Too expensive to purchase |  |  |
| 4 | Lack of know on the best pesticide to use |  |  |
| 5 | Lack of equipment to apply the pesticide to control disease |  |  |
| 6 | Ineffectiveness of the pesticide |  |  |
| 7 | Lack of training on the use of pesticide |  |  |

C21 Are you aware of CCOBOD/ government tree pruning exercise

1 = Yes

2= No

C22 if you are aware has your trees being pruned?

1 = Yes

2= No

C23 If you are aware of the government pruning exercise but your tree has not been pruned kindly explain why?......................................................................................................................................

………………………………………………………………………………………………………………………………………………………

C24 What is the effect of pruning on farm output

1=positive,

2= non change,

3=negative change

C25 Do you prune your cocoa trees yourself?

1 = Yes

2= No

C26 If you do prune your cocoa trees kindly indicate why you prune them……………………………

………………………………………………………………………………………………………

……………………………………………………………………………………………………..

C27 Do you make use of the pruned materials (either pruned by yourself or the government exercise)?

1 = Yes

2= No

C28 If you do make use of pruned material kindly state what you use the pruned materials for. ……………………………………………………………………………………………………..

………………………………………………………………………………………………………

………………………………………………………………………………………………………

C29 If you do not prune cocoa trees on your farm kindly complete the table below

| Sn # | Reasons | Thick as applicable | Order from 1-4 in order of Main reason to minor reason | Remark |
| --- | --- | --- | --- | --- |
| 1 | Not aware of pruning |  |  |  |
| 2 | Spread of disease |  |  |  |
| 3 | Laborious work |  |  |  |
| 4 | Do not know is good |  |  |  |
| 5 | It will not have positive effect on yield |  |  |  |
|  |  |  |  |  |

C30 How did you use Cocoa Pod husk on your farm? Kindly complete the table below

| **Sn #** | **Uses** | **Thick as applicable** | **Order from major use 1 to least use 7** | **Remark** |
| --- | --- | --- | --- | --- |
| 1 | Spread on the farm |  |  |  |
| 2 | Just heap on the farm |  |  |  |
| 3 | Sell it |  |  |  |
| 4 | Burn it to make ask for soap |  |  |  |
| 5 | Do nothing to it on the farm |  |  |  |
| 6 | Use it to make compost |  |  |  |
| 7 | Others (specify) |  |  |  |

C31 Kindly complete the table on major/key constraints to cocoa production,

| Sn# | Constraints | Tick as appropriate | Rank in order of Major constraint 1to least constrain 12 | Remark |
| --- | --- | --- | --- | --- |
| 1 | Declining soil fertility |  |  |  |
| 2 | Pest and disease damage |  |  |  |
| 3 | Mistletoe |  |  |  |
| 4 | High cost of inputs |  |  |  |
| 5 | Access to input on time |  |  |  |
| 6 | Finance to maintain the farm |  |  |  |
| 7 | Low output |  |  |  |
| 8 | Low producer price |  |  |  |
| 9 | Land tenure |  |  |  |
| 10 | Destruction by illegal mining |  |  |  |
| 11 | Drought |  |  |  |
| 12 | Others, please specify: |  |  |  |

**D: SOIL AMENDMENT (inorganic/organic fertilizer) USAGE BY FARMERS**

D1 Can you generally identify poor soil (soil with declined fertility),

1= Yes

2= No

D2 If yes, which method did you use to identify poor soil …………………………………………

…………………………………………………………………………………………………….

……………………………………………………………………………………………………..

D3 Do you think soil fertility of your cocoa farm has decline over the years

1= Yes

2= No

D4 if yes do you take any action to improve the fertility of the soil on your farm?

1 = Yes

2= No

D5 If you take action to improve the fertility of the soil, kindly explain the action to take.

……………………………………………………………………………………………………….

……………………………………………………………………………………………………….

……………………………………………………………………………………………………….

D6 If you are aware of organic fertilizer?

1 = Yes

2= No

D7 If you are aware of organic fertilizer which of these is you aware of (multiple response) tick as many as applicable?

1=Poultry manure.

2= Compost

3= Biochar

4= organic Fertilizer supplied by Cocobod

3= others (specify)…………………

D8 What are the source of chemical fertilizer for your cocoa farm?

| Sn # | Sources | Tick as applicable | Rank from Main source 1to least 7 |
| --- | --- | --- | --- |
| 1 | Cocobod from their office |  |  |
| 2 | Cocobod via Cooperatives |  |  |
| 3 | LBC via Cooperatives |  |  |
| 4 | Cooperative initiative- purchases |  |  |
| 5 | Supply by NGOs |  |  |
| 6 | Dealers – Private purchase |  |  |
| 7 | Others (specify) |  |  |
|  |  |  |  |

D9 What quantity of liquid inorganic fertilizer do you use per acre………………………

D10 What quantity of non-liquid inorganic fertilizer do you use per acre………………………

D11 if you do have training on the use of inorganic fertilizer who offers the training? Kindly complete the table below

| Sn # | Training provider | Tick as applicable | Rank from the trainer with the highest impact 1to trainer with the least impact 7 |
| --- | --- | --- | --- |
| 1 | Cocobod from their office |  |  |
| 2 | Cocobod via Cooperatives |  |  |
| 3 | LBC via Cooperatives |  |  |
| 4 | Cooperative initiative- to organise training |  |  |
| 5 | Training organised by NGOs |  |  |
| 6 | Training organised by Dealers of organic fertilizer |  |  |
| 7 | Others (specify) |  |  |
|  |  |  |  |

D12 What do you perceived as constraints in the use of chemical/ inorganic fertilizer kindly complete the table below

|  | Reasons | Tick as appropriate | Rank the reasons in order of major reason 1 to minor reason 4 | Remarks |
| --- | --- | --- | --- | --- |
| 1 | Expensive |  |  |  |
| 2 | Do not have access to it |  |  |  |
| 3 | Not supplied by Cocobod at the right time |  |  |  |
| 4 | Do not feel that it is important to use it |  |  |  |
| 5 | Labour to apply it to the cocoa trees |  |  |  |
| 6 | Others- specify |  |  |  |

D13 Do you have any training on use of organic fertilizer?

1 = Yes

2= No

D14 if you do have training on use of organic fertilizer indicate who offers the training by completing the table below

| Sn # | Training provider | Tick as applicable | Rank from the trainer with the highest impact 1to trainer with the least impact 7 |
| --- | --- | --- | --- |
| 1 | Cocobod from their office |  |  |
| 2 | Cocobod via Cooperatives |  |  |
| 3 | LBC via Cooperatives |  |  |
| 4 | Cooperative initiative- to organise training |  |  |
| 5 | Training organised by NGOs |  |  |
| 6 | Training organised by Dealers of organic fertilizer |  |  |
| 7 | Others (specify) |  |  |
|  |  |  |  |

D15 Have you ever applied or used organic fertilizer on your cocoa farm

1 = Yes

2= No

D16 What quantity of organic fertilizer do you use per acre (kindly state the unit of measurement ………………………………………………………………………………………………………

D17 if you use/ applied organic fertilizer to your cocoa farm kindly indicate the source by completing the table below

| Sn # | Sources of organic fertilizer | Tick as applicable | Rank from Major source 1to minor source 8 |
| --- | --- | --- | --- |
| 1 | Cocoabod/Cocoa Extension Agents |  |  |
| 2 | Licenced Buying Companies (LBCs) |  |  |
| 3 | NGOs |  |  |
| 4 | Farmer Cooperative initiative |  |  |
| 5 | Individual Purchased from Dealers |  |  |
| 6 | Colleague Farmers |  |  |
| 7 | Self prepared |  |  |
| 8 | Others- specified |  |  |
|  |  |  |  |

D18 If you use organic fertilizer kindly state how you applied it to the cocoa trees

1= ring only

2=Broadcast

3= both Ring and Broadcast

D19 If you do not use organic fertilizer kindly explain why?………………………………

………………………………………………………………………………………………

…………………………………………………………………………………………………..

…………………………………………………………………………………………………..

…………………………………………………………………………………………………..

D20 What do you perceived as constraints in use of organic fertilizer?

|  | Constraints | Tick as appropriate | Rank from major constraint 1 to the minor constraint 6 | Remarks |
| --- | --- | --- | --- | --- |
| 1 | Lack of awareness |  |  |  |
| 2 | Aware but not available |  |  |  |
| 3 | Do not feel it will have good impact on the yield |  |  |  |
| 4 | Its too expensive |  |  |  |
| 5 | Lack of education on it |  |  |  |
| 6 | Labour to apply it to the cocoa trees |  |  |  |
|  |  |  |  |  |

D21 Do you know cocoa pod husk can be used to improve soil fertility?

1 = Yes

2= No

D22 If you know cocoa pod husk can be used as soil amendments (to improve soil fertility), do you use it?

1 = Yes

2= No

D23 if you use it to improve soil fertility, kindly explain how the pod husk is used to improve soil fertility ………………………………………………………………………………………………

………………………………………………………………………………………………………..

………………………………………………………………………………………………………..

………………………………………………………………………………………………………..

D24 If you know that cocoa pod husk can be used to improve soil fertility but you do not use it to improve soil fertility on the farm kindly complete the table below

|  | Reasons | Tick as appropriate | Rank from major reason 1 to minor reason 3 | Remarks |
| --- | --- | --- | --- | --- |
| 1 | Risk of spreading disease |  |  |  |
| 2 | Insufficient labour to carry of the task of using the husk |  |  |  |
| 3 | I have other uses for it |  |  |  |
|  |  |  |  |  |

**E: COMPOST**

E1 Have you ever heard of Compost?

1 = Yes

2= No

E2 If you ever heard of Compost indicate where (multiple response) tick as many as applied?

1=extension officers/ Cocobod

2= LBCs

3= NGO

4= Farmer Cooperative (they organize to invite expert to educate them)

5= from colleagues farmers

5= others (specify)…………………………..

E3 Can you prepare compost

1 = Yes

2= No

E4 If you can prepare compost explain the process

…………………………………………………………………………………………

…………………………………………………………………………………………………..

…………………………………………………………………………………………………..

E5 State materials you have used in compost preparation …………………………….

E6 If you ever used compost on your farm kindly state or indicate how you apply the compost to the Cocoa trees

1= ring only

2=Broadcast Only

3= both Ring and Broadcast

E7 If you do not know how to prepare Compost are you willing to learn how to prepare and use on your farm?

1 = Yes

2= No

**E8** if you are willing to learn how to prepare Compost indicate the appropriate entity/ person to train farmers on how to prepare and apply compost

| Sn # | Entity to offer training on compost preparation | Tick as applicable | Rank from most appropriate entity 1 to least appropriate entity 7 |
| --- | --- | --- | --- |
| 1 | Cocoabod/Cocoa Extension Agents |  |  |
| 2 | Licenced Buying Companies (LBCs) |  |  |
| 3 | NGOs |  |  |
| 4 | Farmer Cooperative to identify trainers |  |  |
| 5 | Dealers in compost and fertilizer |  |  |
| 6 | Colleague lead Farmers |  |  |
| 7 | Others- specified |  |  |
|  |  |  |  |
|  |  |  |  |

E9 If you are ***NOT*** willing to learn how to prepare Compost, kindly explain why?............

………………………………………………………………………………………………………………..……………………………………………………………………………………………………………………………………………………………………………………………………..

E10 Are you willing to buy compost to apply to your cocoa trees

1 = Yes

2= No

E11 If you are ***NOT*** willing buy Compost, kindly explain why?............

………………………………………………………………………………………………………………..……………………………………………………………………………………………………………………………………………………………………………………………………..

**F: BIOCHAR (*sample will be shown to the farmer by the enumerator*)**

F1 Have you ever heard of Biochar?

1 = Yes

2= No

F2 If you ever heard of Biochar indicate the source (multiple response)….……………………..

1=extension officers/ Cocobod

2= LBCs

3= NGO

4= Farmer Cooperative (they organize to invite expert to educate them)

5= from colleagues farmers

5= others (specify)…………………………..

F3 Can you prepare Biochar?

1 = Yes

2= No

F4 If you can prepare Biochar explain the process ……………………………………………

……………………………………………………………………………………………………..

…………………………………………………………………………………………………….

F5 If you ever prepare Biochar what materials did you use …………………………………………

……………………………………………………………………………………………………..

……………………………………………………………………………………………………..

F6 If you ever used ***Biochar*** on your farm, kindly state or indicate the method used in applying Biochar to the Cocoa trees

1= ring only

2=Broadcast

3= both Ring and Broadcast

F7 If you do not know how to prepare Biochar are you willing to learn how to prepare and use on your farm?

1 = Yes

2= No

**F8** if you are willing to learn how to prepare Biochar indicate the appropriate entity/ person to train farmers on how to prepare and apply compost

| Sn # | Entity to offer training on Biochar preparation | Tick as applicable | Rank from most appropriate entity 1 to least appropriate entity 7 |
| --- | --- | --- | --- |
| 1 | Cocoabod/Cocoa Extension Agents |  |  |
| 2 | Licenced Buying Companies (LBCs) |  |  |
| 3 | NGOs |  |  |
| 4 | Farmer Cooperative to identify trainers |  |  |
| 5 | Dealers in compost and fertilizer |  |  |
| 6 | Colleague lead Farmers |  |  |
| 7 | Others- specified |  |  |
|  |  |  |  |
|  |  |  |  |

F9 If you are ***NOT*** willing to learn how to prepare Biochar, kindly explain why?............

………………………………………………………………………………………………………………..……………………………………………………………………………………………………………………………………………………………………………………………………..

F10 Are you willing to buy Biochar to apply to your cocoa trees

1 = Yes

2= No

F11 If you are ***NOT*** willing buy Biochar, kindly explain why?............

………………………………………………………………………………………………………………..……………………………………………………………………………………………………………………………………………………………………………………………………..
